# Supplementary material for: Plasmodium falciparum kinetochore proteins stabilise a nexus between the mitotic apparatus and the apical complex
Source: Research Square preprint supplement (doi:10.21203/rs.3.rs-3404985/v1), 2023-10-03
Supplement: Supplementary file 1 [file 924df87ccd18fba815a855ea.xlsx]

## Sheet: Fig. 3a
Fig. 3a	Parasitemia (%)
Cell cycle	Control			mean of control	SD of control	n	cKO/KD			mean of cKO/KD	SD of cKO/KD	n
1	1.13333	1.06667	1.1	1.1	0.033333	3	1.1	1.16667	1.16667	1.14444	0.0384902	3
2	3.2	3.76667	3.83333	3.6	0.34801	3	1.03333	1	1.33333	1.12222	0.183586	3
3	9.26667	7.66667	8	8.31111	0.844152	3	1.03333	0.9	1.33333	1.08889	0.221944	3
4	17.4	19.7	19.2333	18.7778	1.21579	3	1.6	1.2	2.1	1.63333	0.450925	3
The parasitemia of control and cKO/KD cells was measured in three indivdual wells. For each well the parasitemia was assessed in triplicate.
1st cell cycle of control cell						1st cell cycle of cKO/KD
Measure time	Well number of control					Measure time	Well number of cKO/KD
	1	2	3				1	2	3
1	1.1	1.1	1.1			1	1.1	1.2	1.1
2	1.1	1	1.1			2	1.1	1.1	1.2
3	1.2	1.1	1.1			3	1.1	1.2	1.2
mean	1.13333	1.06667	1.1			mean	1.1	1.16667	1.16667
2nd cell cycle of control cell						2nd cell cycle of cKO/KD
Measure time	Well number of control					Measure time	Well number of cKO/KD
	1	2	3				1	2	3
1	3.2	3.7	3.7			1	1	1	1.5
2	3.4	3.9	3.8			2	1.1	1	1.2
3	3	3.7	4			3	1	1	1.3
mean	3.2	3.76667	3.83333			mean	1.03333	1	1.33333
3rd cell cycle of control cell						3rd cell cycle of cKO/KD
Measure time	Well number of control					Measure time	Well number of cKO/KD
	1	2	3				1	2	3
1	9.2	7.4	7.5			1	1	0.9	1.2
2	9.3	7.8	8			2	1	0.9	1.4
3	9.3	7.8	8.5			3	1.1	0.9	1.4
mean	9.26667	7.66667	8			mean	1.03333	0.9	1.33333
4th cell cycle of control cell						4th cell cycle of cKO/KD
Measure time	Well number of control					Measure time	Well number of cKO/KD
	1	2	3				1	2	3
1	17.7	18.3	17.8			1	1.7	1.2	2.1
2	15.8	20.3	19.9			2	1.7	1.2	2.1
3	18.7	20.5	20			3	1.4	1.2	2.1
mean	17.4	19.7	19.2333			mean	1.6	1.2	2.1

## Sheet: Fig. 3d
Fig. 3c Percentage of correctly positioned centrin puncta
cell type (NDC80-HA)	Percentage of correctly positioned centrin puncta																				mean	SD	n
Control	1	1	1	1	1	1	1	1	1	1	1	1	1	1	1	1	1	1	1	1	1	0	20
cKO/KD	0.3	0.346154	0.111111	0.1	0.235294	0.0416667	0.473684	0	0.210526	0.0588235	0	0.105263	0.178571	0	0.8	0	0	0.178571	0.3125	0.05	0.175	0.2	20
Raw data for NDC80-HA Control
Number of centrin puncta connected with the nucleus	30	20	20	26	22	28	22	24	24	28	24	26	30	26	30	20	26	23	24	21
Number of centrin puncta disconnceted from the nucleus	0	0	0	0	0	0	0	0	0	0	0	0	0	0	0	0	0	0	0	0
Total number of centrin puncta	30	20	20	26	22	28	22	24	24	28	24	26	30	26	30	20	26	23	24	21
Percentrage of correctly positioned centrin puncta	1	1	1	1	1	1	1	1	1	1	1	1	1	1	1	1	1	1	1	1
Raw data for NDC80-HA conditional knockout/knockdown
Number of centrin puncta connected with the nucleus	6	9	2	2	4	1	9	0	4	1	0	2	5	0	12	0	0	5	5	1
Number of centrin puncta disconnceted from the nucleus	14	17	16	18	13	23	10	13	15	16	26	17	23	26	3	11	19	23	11	19
Total number of centrin puncta	20	26	18	20	17	24	19	13	19	17	26	19	28	26	15	11	19	28	16	20
Percentrage of correctly positioned centrin puncta	0.3	0.346154	0.111111	0.1	0.235294	0.0416667	0.473684	0	0.210526	0.0588235	0	0.105263	0.178571	0	0.8	0	0	0.178571	0.3125	0.05

## Sheet: Fig. 4c
Fig. 4c Ratio of naked nuclei/total nuclei
Cell type (NDC80-HA)	ratio of naked nuclei/total nuclei																								mean	SD	n
Control	0.0434783	0.05	0	0	0	0	0.05	0	0	0	0	0	0	0	0	0	0	0	0	0	0	0	0	0	0.00597826	0.0161953	24
cKO/KD	0.230769	0.714286	0.580645	0.4	0.185185	0.62963	0.758621	0.625	0.652174	0.863636	0.962963	0.771429	0.807692	0.823529	0	0.782609	0.892857	0.882353	0.714286	0.846154	0.590909	0.807692	0.388889	0.818182	0.655395	0.247526	24
Raw data of NDC80-HA control
Number of naked nuclei	1	1	0	0	0	0	1	0	0	0	0	0	0	0	0	0	0	0	0	0	0	0	0	0
Total number of nuclei	23	20	26	19	30	24	20	23	23	17	25	18	21	25	22	24	28	20	22	25	25	23	26	24
Ratio of naked nuclei/total nuclei	0.0434783	0.05	0	0	0	0	0.05	0	0	0	0	0	0	0	0	0	0	0	0	0	0	0	0	0
Raw data of NDC80-HA CKO/KD
Number of naked nuclei	6	15	18	8	5	17	22	15	15	19	26	27	21	14	0	18	25	15	15	22	13	21	7	27
Total number of nuclei	26	21	31	20	27	27	29	24	23	22	27	35	26	17	22	23	28	17	21	26	22	26	18	33
Ratio of naked nuclei/total nuclei	0.230769	0.714286	0.580645	0.4	0.185185	0.62963	0.758621	0.625	0.652174	0.863636	0.962963	0.771429	0.807692	0.823529	0	0.782609	0.892857	0.882353	0.714286	0.846154	0.590909	0.807692	0.388889	0.818182

## Sheet: Fig. 4d
Fig. 4d Ratio of empty merozoites/total merozoites
cell type (NDC80-HA)	Ratio of empty merozoites/total merozoites																								mean	SD	n
Control	0.0434783	0.05	0	0	0	0	0.05	0	0	0	0	0	0	0	0	0	0	0	0	0	0	0	0	0	0.00597826	0.0161953	24
cKO/KD	0.130435	0.666667	0.409091	0.478261	0.0434783	0.5	0.65	0.470588	0.578947	0.869565	0.95	0.666667	0.75	0.85	0.0434783	0.6875	0.8	0.9	0.625	0.789474	0.307692	0.75	0.3125	0.647059	0.578183	0.260894	24
Raw data for NDC80-HA control
Number of empty merozoite	1	1	0	0	0	0	1	0	0	0	0	0	0	0	0	0	0	0	0	0	0	0	0	0
Total number of merozoites	23	20	26	19	30	24	20	23	23	17	25	18	21	25	22	24	28	20	22	25	25	23	26	24
Ratio of empty merozoites/total merozoites	0.0434783	0.05	0	0	0	0	0.05	0	0	0	0	0	0	0	0	0	0	0	0	0	0	0	0	0
Raw data for NDC80-HA cKO/KD
Number of empty merozoite	3	12	9	11	1	10	13	8	11	20	19	16	15	17	1	11	12	18	10	15	4	15	5	11
Total number of merozoites	23	18	22	23	23	20	20	17	19	23	20	24	20	20	23	16	15	20	16	19	13	20	16	17
ratio of empty merozoites/total merozoites	0.130435	0.666667	0.409091	0.478261	0.0434783	0.5	0.65	0.470588	0.578947	0.869565	0.95	0.666667	0.75	0.85	0.0434783	0.6875	0.8	0.9	0.625	0.789474	0.307692	0.75	0.3125	0.647059

## Sheet: Supp Fig. 8c
Fig. 8c Number of merozoites
cell type (NDC80-HA)	Number of merozoites																								mean	SD	n
Control	23	20	26	19	30	24	20	23	23	17	25	18	21	25	22	24	28	20	22	25	25	23	26	24	23.0417	3.0995	24
cKO/KD	23	18	22	23	23	20	20	17	19	23	20	24	20	20	23	16	15	20	16	19	13	20	16	17	19.4583	2.97788	24

## Sheet: Supp Fig. 8d
Fig. 8c Number of nuclei
cell type (NDC80-HA)	Number of nuclei																								mean	SD	n
Control	23	20	26	19	30	24	20	23	23	17	25	18	21	25	22	24	28	20	22	25	25	23	26	24	23.0417	3.0995	24
cKO/KD	26	21	31	20	27	27	29	24	23	22	27	35	26	17	22	23	28	17	21	26	22	26	18	33	24.625	4.69794	24

## Sheet: Supp Fig. 8e
Fig. 8e Ratio of merozoites/nuclei
cell type (NDC80-HA)	Ratio of merozoites/nuclei																								mean	SD	n
Control	1	1	1	1	1	1	1	1	1	1	1	1	1	1	1	1	1	1	1	1	1	1	1	1	1	0	24
cKO/KD	0.884615	0.857143	0.709677	1.15	0.851852	0.740741	0.689655	0.708333	0.826087	1.04546	0.740741	0.685714	0.769231	1.17647	1.04546	0.695652	0.535714	1.17647	0.761905	0.730769	0.590909	0.769231	0.888889	0.515152	0.814411	0.183226	24

## Sheet: Supp Fig. 8f
Fig. 8f Nuclei volume (um3)
cell type (NDC80-HA)				mean	SD	n
Control	cKO/KD		Control	43.2841	10.4334	452
23.3959	54.3956		cKO/KD	37.2634	33.5357	545
25.9939	8.97257
39.6435	2.42275
27.6752	6.03456
25.3183	17.5242
55.3003	37.6673
29.735	8.56949
22.8973	29.2722
24.9502	7.22181
31.5046	41.9128
28.4954	12.6273
57.0391	17.9784
31.0295	28.9617
30.8117	30.8773
27.1783	149.215
28.1185	51.6947
65.7798	145.406
26.3049	85.9895
27.6483	16.3031
26.9138	21.8883
29.611	43.1288
24.897	16.8449
28.6071	7.24939
31.0039	8.94672
44.5965	36.9849
43.9458	29.4122
42.6046	8.92905
34.9687	6.4869
43.0119	19.707
37.4831	4.54872
51.774	15.5219
35.9787	18.0723
37.6893	17.2317
40.7927	15.0486
40.7452	15.4132
39.3523	13.6369
44.6656	41.3838
53.1515	24.8377
42.5029	13.3599
44.194	38.1714
35.9829	3.89098
25.3663	8.74279
44.7861	49.3756
49.0422	25.8258
43.3116	16.0118
34.4946	12.3901
32.5436	17.0335
38.399	7.88354
54.9486	18.684
44.9717	22.9042
41.6248	18.8099
47.8049	14.7475
44.3527	40.6001
44.8246	41.2734
50.4746	5.7903
20.5152	19.3552
45.3388	26.5574
41.1068	5.99822
46.4239	26.7839
69.3064	18.7386
41.7399	29.9759
42.7521	126.72
21.6137	31.3196
37.0722	34.5989
36.9897	9.05459
54.4934	21.7177
36.1535	10.4926
44.0937	33.1737
47.3177	22.7206
49.6582	9.7145
45.8165	49.5222
39.8605	52.2027
43.8507	115.606
45.4085	37.2673
37.0983	16.0506
39.8611	105.864
47.2794	4.64126
47.6367	34.7899
41.6019	65.0768
40.5716	5.72973
52.9571	32.1601
33.9584	25.0735
40.1866	47.1997
48.636	48.7238
54.3249	44.2994
46.1316	36.2165
46.4969	23.3617
49.1999	31.8029
41.3182	26.5572
50.2991	74.6639
49.5071	30.7906
47.1811	59.3001
48.583	49.8537
54.0518	28.7222
51.0765	127.901
39.484	210.229
46.0844	56.8712
53.2771	82.3281
42.1236	7.71065
40.5717	34.7474
44.6108	18.2056
41.6279	18.395
37.7001	117.314
44.5713	134.616
32.0584	15.3065
37.9647	28.699
27.1598	15.2725
28.5117	17.9088
25.8322	50.4513
33.7048	4.18902
27.3798	31.8804
39.6428	106.594
38.9447	28.9386
29.0433	69.8809
34.554	50.8423
27.2984	7.18111
40.3871	111.076
37.7708	27.9982
29.9929	5.2812
34.8987	13.4723
65.0961	36.5548
39.8794	34.3425
23.5602	31.1016
28.4666	20.2641
38.8467	86.1458
39.0654	35.3185
41.4127	43.0229
40.0517	6.04638
41.7374	34.8247
48.2422	13.6493
47.0779	1.66146
40.9384	27.8509
40.5559	21.3842
41.8336	2.18546
49.5554	32.6877
48.634	8.27458
41.7644	3.56105
51.936	44.8446
49.8403	35.6312
48.732	29.6827
60.1951	62.8139
86.8582	15.6254
56.6276	26.0613
46.8775	26.1975
44.561	119.593
46.8308	98.492
39.3776	33.0291
42.3226	3.69118
31.3508	9.12455
58.7012	80.8749
38.4982	22.6028
41.2953	41.9382
50.7444	86.2121
51.7287	26.3726
46.3695	0.852115
41.8797	13.6464
58.2016	23.0222
41.7562	6.59543
48.8429	4.30303
61.5537	2.8099
47.7041	14.4711
52.5146	26.1781
47.815	22.9712
61.8614	23.728
51.3973	34.336
46.4862	11.7
46.599	11.9481
54.6706	33.3817
52.8393	39.9183
50.4174	39.2813
44.8575	34.8044
41.2816	95.1643
42.6503	26.5275
41.8671	92.7049
54.8325	76.783
50.7436	69.9297
42.3155	22.2808
47.8519	52.2557
54.0153	33.837
57.7095	66.1672
50.9405	87.4383
57.6388	12.1694
62.8404	56.3208
57.9302	63.5841
69.219	182.298
51.4682	57.2609
53.6641	8.7609
52.5881	14.9182
44.6997	23.542
43.8202	13.0264
67.2279	4.88308
49.838	13.2663
35.9779	39.0283
46.3748	19.0803
37.4628	14.895
74.4597	4.21989
37.0761	12.8218
42.0992	6.59876
41.2458	34.0692
33.9976	36.3482
35.6205	27.5245
34.6085	44.2645
29.3595	68.7261
36.9174	25.5605
28.096	20.0488
39.2321	34.0929
38.5787	22.4538
49.2564	2.82297
44.3506	13.0027
34.6783	11.87
37.8099	34.486
49.2324	19.5376
37.1852	25.9751
40.0036	35.1916
38.6875	4.07363
34.1091	27.6018
33.8128	4.51432
62.2593	15.632
33.7149	38.296
33.6306	56.2851
27.3063	34.6851
33.0994	39.8423
27.8604	6.66295
32.7393	42.3593
32.8385	15.8003
27.8665	20.1687
66.7991	25.8356
34.1663	4.65829
25.0776	34.7385
31.4983	32.583
30.1748	28.2873
30.1402	31.3363
25.9255	24.8699
28.1149	47.2882
32.4159	150.757
35.2157	15.7079
31.335	69.8272
61.1176	1.65883
31.6622	104.314
25.9575	26.9519
29.0587	5.69064
33.7871	71.3067
37.2285	1.55215
48.9392	73.7779
45.0643	24.5246
38.5164	34.6938
36.3645	1.54477
44.165	200.008
47.7041	7.59529
43.6808	55.9491
52.0825	41.3003
39.7286	79.932
37.405	56.9805
72.6465	35.4651
37.9631	115.961
50.5556	165.079
34.5081	69.545
36.219	34.8958
40.0823	30.8153
48.8238	51.6993
48.1026	48.1464
43.5898	26.3463
43.021	64.7734
36.2584	9.08247
30.9296	17.8923
36.8905	16.7798
38.8521	57.4537
31.1837	28.4788
32.7709	25.2645
43.9276	117.437
28.6164	71.5162
28.707	26.4215
43.5169	46.3864
31.4734	86.9362
35.5931	6.08265
25.8132	8.58256
22.4987	10.3255
48.8084	7.26673
52.335	17.4714
31.2303	21.0722
23.5587	42.7473
36.6003	45.5023
31.7955	8.10065
26.1588	12.418
45.6661	8.62498
40.5676	75.1577
40.2398	71.6007
36.0897	37.7921
36.7403	12.3222
40.5425	29.7721
39.7686	74.0227
30.2211	22.4532
47.4356	11.0485
34.3172	35.5654
40.7715	25.1063
50.7798	48.4097
41.9146	17.9221
42.7996	56.6508
36.0864	23.0634
43.3651	30.475
39.5465	19.0194
42.0974	31.5186
37.2324	62.6179
41.9545	36.4608
42.4799	30.9455
43.5637	16.5042
39.6893	17.0193
38.5678	32.4676
37.7992	26.7241
40.7989	57.4158
42.168	14.6948
44.7335	48.1754
19.6533	13.0169
26.851	20.7248
44.7542	25.3987
43.7271	23.7421
39.7143	28.3473
50.2542	33.2558
49.5861	11.9853
39.8109	76.1337
43.9894	16.6451
38.904	10.057
35.5629	24.7967
42.9332	11.1475
36.9692	50.0285
37.9349	29.2475
50.7382	13.9172
40.6559	26.4302
41.0544	33.9546
38.532	22.6465
38.9603	75.4639
49.1944	83.5067
39.8159	61.3887
48.9498	172.307
42.3963	117.632
42.7549	18.4499
40.5916	79.5481
41.6653	16.5793
45.4048	14.088
48.7722	24.2993
51.6288	13.7889
42.1955	7.42739
38.1203	29.5764
45.1031	9.20223
39.9671	12.5543
38.6844	13.2379
39.7169	68.2086
40.3538	18.0234
39.7265	30.663
45.6332	96.0639
32.1501	46.7943
41.0413	92.3923
42.6244	63.1447
37.1188	10.3683
45.6727	18.5256
40.2752	68.1117
60.5291	19.3884
47.3181	86.0481
56.2607	31.8948
54.3951	72.3978
58.8524	4.98579
63.6427	73.143
68.7396	4.37633
56.681	63.648
42.6026	19.3094
55.6552	22.6785
52.3683	2.20761
51.4839	1.80779
49.5846	21.1835
40.8964	21.0301
35.1274	72.439
48.132	46.0405
46.7611	11.473
45.1548	12.2704
60.496	25.229
61.7987	54.9177
50.4675	2.53855
52.1822	165.775
52.8283	3.68403
48.8854	19.226
60.8273	33.5532
57.6391	8.24889
43.984	61.6387
41.7236	52.0143
55.7408	12.1446
49.528	92.8029
44.8813	52.1161
40.0088	8.07894
55.0692	44.9844
60.8106	34.4057
55.8051	26.5562
46.3517	61.3074
48.6705	18.5608
58.7731	53.4571
58.8209	44.0615
50.2622	38.6189
59.2683	72.2355
52.8914	17.8702
56.0751	24.4451
66.3549	14.4598
47.5133	17.8693
59.9227	47.1468
54.0271	48.9753
50.7014	41.8036
48.2945	17.6112
37.6206	1.84209
37.512	45.7556
43.7421	55.9089
31.0021	41.7741
46.5452	45.3527
45.2656	50.6566
50.2562	63.7831
31.4114	53.7534
38.5214	49.1376
42.6768	32.3714
32.9495	30.1814
48.9592	44.1788
36.9204	48.2382
34.012	142.94
35.7461	4.24317
53.8426	35.2351
41.3471	12.8465
44.5405	163.417
39.223	24.4252
45.0975	76.6775
32.7931	22.1129
37.9613	21.9094
53.5444	12.2679
63.9878	17.613
61.6235	2.54418
66.8695	80.5528
58.9682	84.5933
59.3071	13.7368
21.4238	46.7129
37.3102	93.5326
51.1194	62.1299
42.2699	17.0062
49.5216	77.0459
49.8704	26.5949
76.4044	15.4589
34.3254	38.3631
61.0449	40.9392
62.2832	26.3499
54.0236	69.1146
54.666	27.7254
46.6239	17.1549
60.5627	59.4305
42.3108	28.1625
65.7108	56.3548
61.2138	32.3173
60.8778	44.1305
52.8178	7.37119
	107.058
	22.628
	22.5288
	79.3568
	60.0654
	2.80548
	111.407
	46.2875
	13.4427
	34.8483
	34.8266
	10.7804
	20.4441
	42.3382
	12.3796
	72.3717
	24.7439
	85.419
	26.3693
	15.1053
	23.163
	124.826
	8.02029
	15.9191
	40.7309
	90.3068
	6.38097
	94.5629
	31.4951
	137.57
	5.77001
	28.9741
	11.656
	75.8876
	68.9863
	60.6362
	30.9982
	122.072
	39.0151
	5.92362
	50.0243
	16.5784
	5.91009
	5.64108
	100.695
	37.4125
	18.2528
	178.276
	53.6572
	40.4374
	53.8369
	24.6869
	49.8315
	62.765
	31.8815
	37.2846
	3.07826
	19.1557
	29.6052
	31.4304
	18.1241
	3.10112
	37.0723
	57.9887
	3.16541
	18.0705
	26.8666
	7.85353
	26.1961
	53.4472
	7.71657
	3.01447
	8.95715
	20.882
	10.5555
	20.1235
	17.7598
	33.1708
	16.9529
	13.7529
	12.5369
	47.3559
	9.15265
	11.7656
	29.5803
	24.3338
	1.1506
	16.0742
	4.9714
	17.3424
	16.5233
	24.0939
	1.02691

## Sheet: Supp Fig. 9a
Supp Fig. 9a	Parasitemia (%)
Cell cycle	Control			mean of control	SD of control	n	cKO/KD			mean of cKO/KD	SD of cKO/KD	n
1	1.6	1.56667	1.43333	1.53333	0.088192	3	1.5	1.43333	1.5	1.47778	0.0384902	3
2	5.83333	5.4	5.26667	5.5	0.296273	3	1.53333	1.53333	1.5	1.52222	0.0192448	3
3	10.1667	8.9	9	9.35556	0.704222	3	1.86667	2	2.03333	1.96667	0.0881914	3
4	18.3	17.2333	17.8	17.7778	0.533682	3	1.96667	1.8	1.93333	1.9	0.0881918	3
The parasitemia of control and cKO/KD cells was measured in three indivdual wells. For each well the parasitemia was assessed in triplicate.
1st cell cycle of control cell						1st cell cycle of cKO/KD
Measure time	Well number of control					Measure time	Well number of cKO/KD
	1	2	3				1	2	3
1	1.7	1.7	1.5			1	1.6	1.5	1.4
2	1.6	1.5	1.4			2	1.5	1.4	1.6
3	1.5	1.5	1.4			3	1.4	1.4	1.5
mean	1.6	1.56667	1.43333			mean	1.5	1.43333	1.5
2nd cell cycle of control cell						2nd cell cycle of cKO/KD
Measure time	Well number of control					Measure time	Well number of cKO/KD
	1	2	3				1	2	3
1	5.9	5.6	5.4			1	1.6	1.4	1.5
2	5.9	5.5	5.2			2	1.5	1.6	1.5
3	5.7	5.1	5.2			3	1.5	1.6	1.5
mean	5.83333	5.4	5.26667			mean	1.53333	1.53333	1.5
3rd cell cycle of control cell						3rd cell cycle of cKO/KD
Measure time	Well number of control					Measure time	Well number of cKO/KD
	1	2	3				1	2	3
1	10.3	9.4	9.2			1	2	2.1	2.1
2	10.4	9	9.2			2	1.8	2	2
3	9.8	8.3	8.6			3	1.8	1.9	2
mean	10.1667	8.9	9			mean	1.86667	2	2.03333
4th cell cycle of control cell						4th cell cycle of cKO/KD
Measure time	Well number of control					Measure time	Well number of cKO/KD
	1	2	3				1	2	3
1	17.2	15.6	16.3			1	1.9	1.5	2
2	19	18.6	17.6			2	2	1.8	2
3	18.7	17.5	19.5			3	2	2.1	1.8
mean	18.3	17.2333	17.8			mean	1.96667	1.8	1.93333
